# Supplementary material for: Acacetin and Chrysin, Two Polyphenolic Compounds, Alleviate Telomeric Position Effect in Human Cells
Source: PubMed Central journal article supplement — Mol Ther Nucleic Acids. 2013 Aug 20;2(8):e116–. doi: 10.1038/mtna.2013.42 (PMC3759739; doi:10.1038/mtna.2013.42), 2013-08-20
Supplement: mtna201342x2.pdf [file mtna201342x2.pdf]

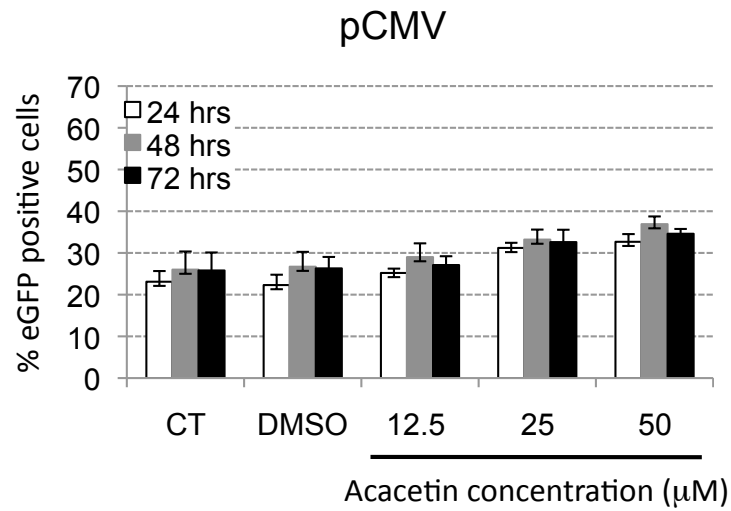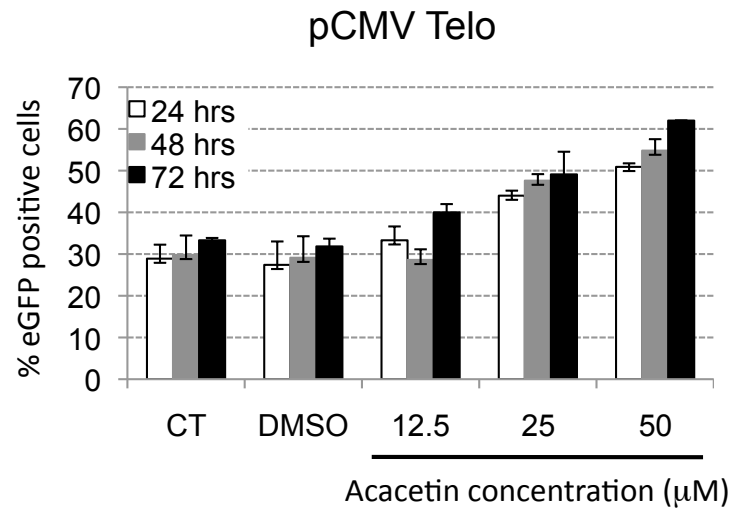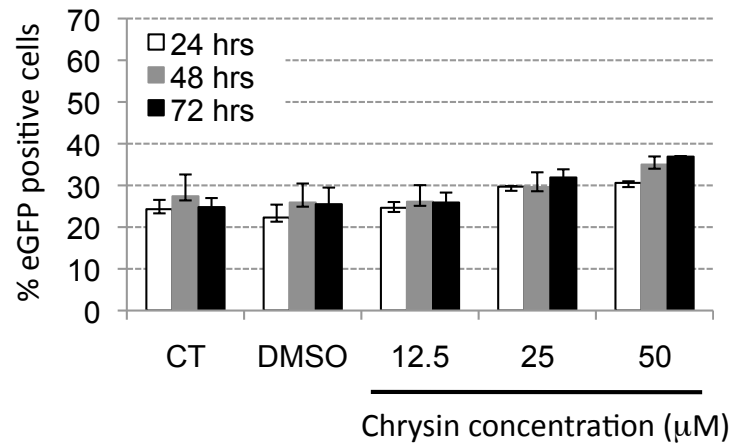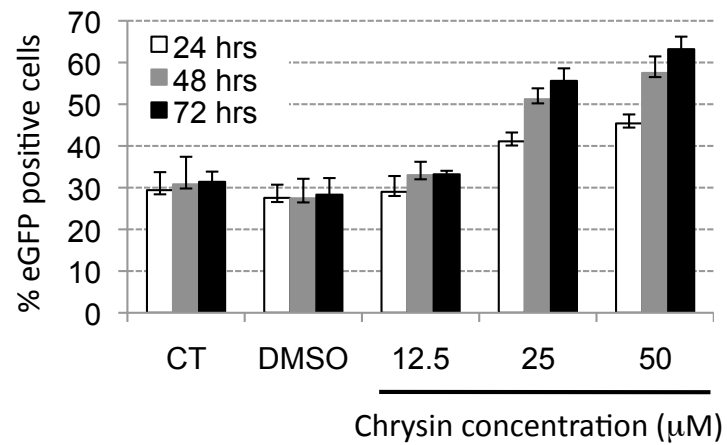

**Figure S2. Dose response assay.**

C33A cells stably transfected with either the pCMV or the pCMV Telo vector were treated by increasing concentration of Chrysin or Acacetin for 24; 48 or 72 hrs and the percentage of eGFP positive cells was determined by flow cytometry.
