# Supplementary material for: Acacetin and Chrysin, Two Polyphenolic Compounds, Alleviate Telomeric Position Effect in Human Cells
Source: PubMed Central journal article supplement — Mol Ther Nucleic Acids. 2013 Aug 20;2(8):e116–. doi: 10.1038/mtna.2013.42 (PMC3759739; doi:10.1038/mtna.2013.42), 2013-08-20
Supplement: mtna201342x3.pdf [file mtna201342x3.pdf]

**a**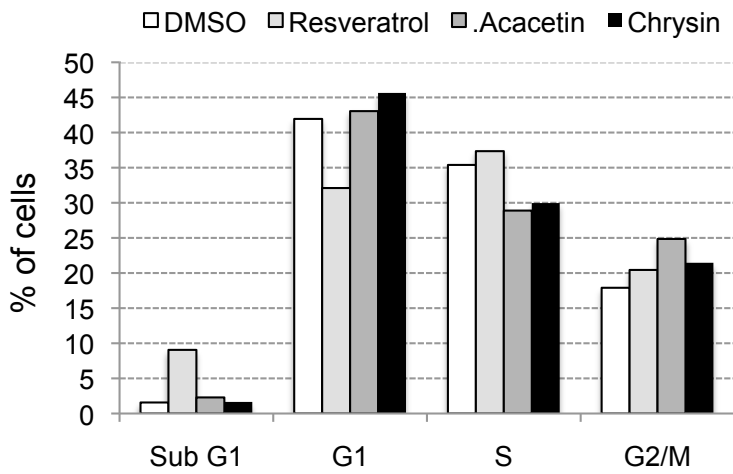**b**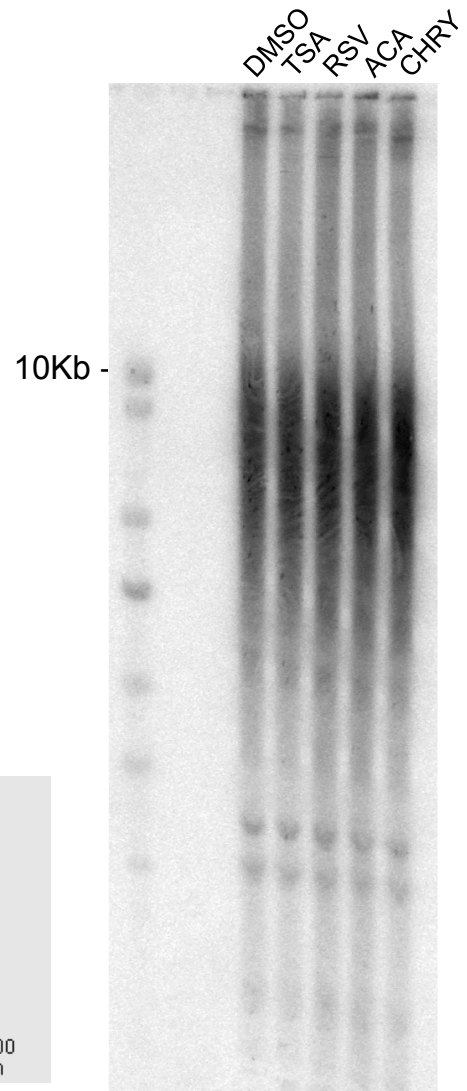**c**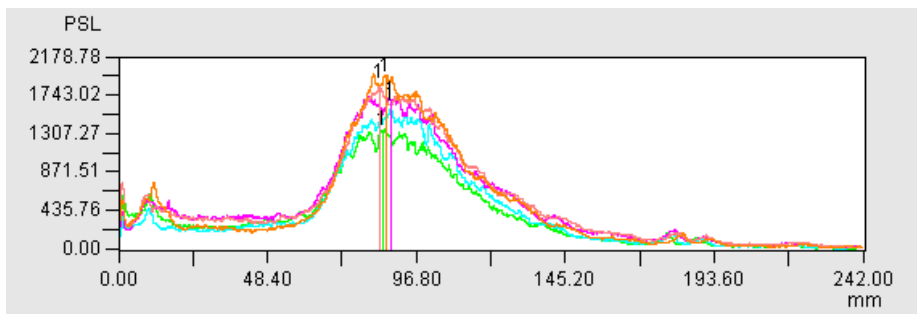

— DMSO — TSA — Resveratrol — Acacetin — Chrysin

### Supplementary figure 3. Effect of Acacetin and Chrysin on cell cycle and telomere length.

(a) Cell cycle of cells treated with different drugs. At day 0, cells were plated at a density of  $1 \times 10^6$  cells in a 10 cm plate. 25  $\mu\text{M}$  of drugs were added to the medium a few hours after plating. Cells were harvested and analysed after six days in the presence of the drug. (b) Teloblot was performed on C33A cells treated for four days with a final concentration of 25  $\mu\text{M}$  of the different drugs (TSA: Trichostatin A; RSV: Resveratrol; ACA: acacetin; CHRY: Chrysin). (c) The signal intensity (PSL: Photostimulated intensity) of the terminal telomeric fragments shown in (b) is measured along the membrane with the Imagequant shareware. A similar length of the terminal fragments is observed for all the samples.
