# Supplementary material for: Acacetin and Chrysin, Two Polyphenolic Compounds, Alleviate Telomeric Position Effect in Human Cells
Source: PubMed Central journal article supplement — Mol Ther Nucleic Acids. 2013 Aug 20;2(8):e116–. doi: 10.1038/mtna.2013.42 (PMC3759739; doi:10.1038/mtna.2013.42), 2013-08-20
Supplement: mtna201342x4.pdf [file mtna201342x4.pdf]

**a**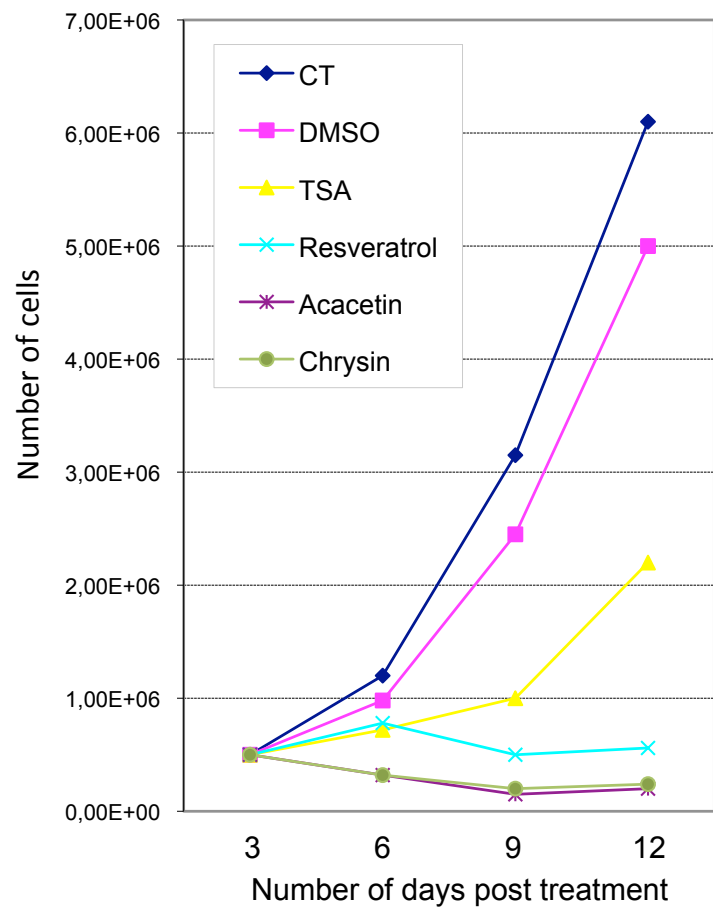**b**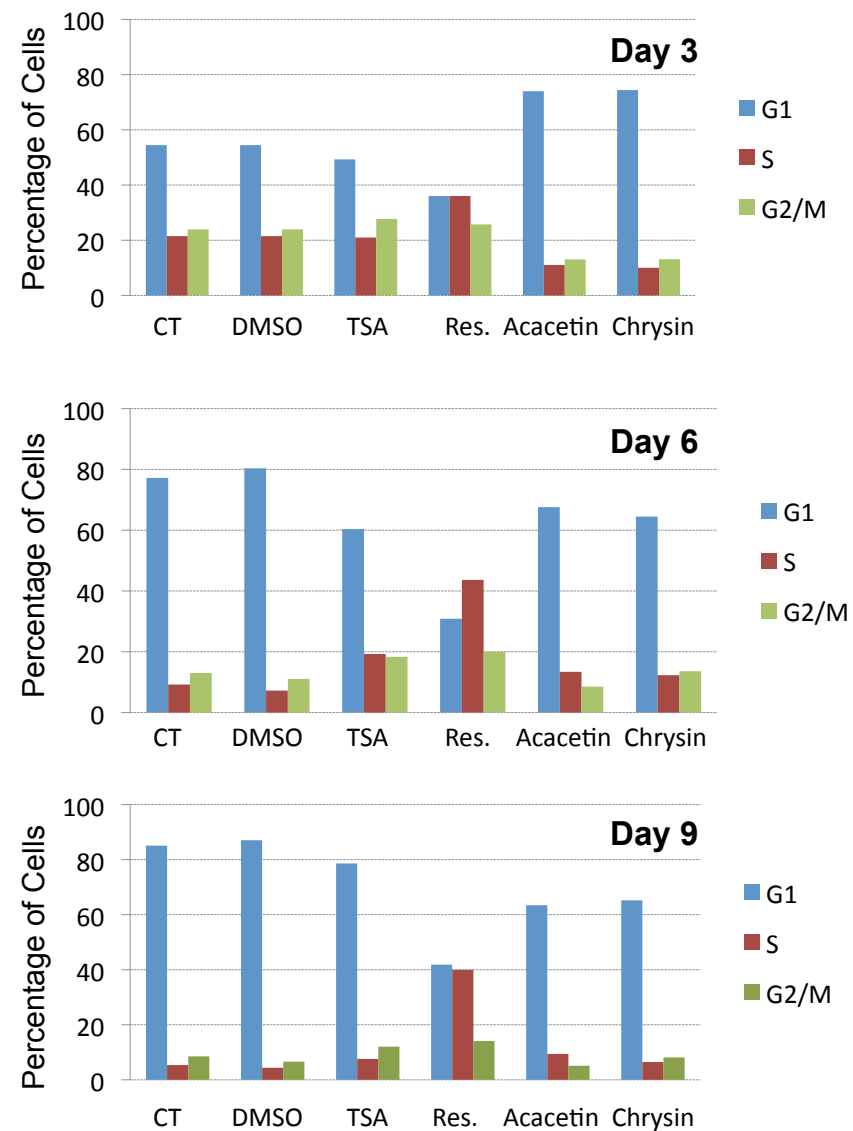

### Figure S4. Acacetin and Chrysin induce premature growth arrest of IM90 cells

IMR90 cells were treated by the indicated compounds for the indicated time: (a) the number of cells were scored and (b) the percentage of cells at different stages of cell cycle was determined by flow cytometry after BrDU incorporation. CT = without drug. TSA: Trichostatin A; Res: Resveratrol.
